# Supplementary material for: Negative Feedback Regulation of HIV-1 by Gene Editing Strategy
Source: PubMed Central journal article supplement (PMC4985742; doi:10.1038/srep31527), 2016-08-16

## SUPPLEMENTARY FIGURES

### Negative Feedback Regulation of HIV-1 by Gene Editing Strategy

Rafal Kaminski<sup>1†</sup>, , Yilan Chen<sup>1</sup>, Julian Salkind<sup>1</sup>, Ramona Bella<sup>1</sup> Won-bin Young<sup>2</sup>,  
Pasquale Ferrante<sup>1,3</sup>, Jonathan Karn<sup>4</sup>, Thomas Malcolm<sup>5</sup>, Wenhui Hu<sup>1†</sup>, Kamel Khalili<sup>1†</sup>

1. Department of Neuroscience  
Center for Neurovirology  
Lewis Katz School of Medicine at Temple University  
3500 N. Broad Street, 7<sup>th</sup> Floor  
Philadelphia, PA 19140

2. Department of Radiology  
University of Pittsburgh School of Medicine  
Pittsburgh, PA 15219

3. Microbiology and Clinical Microbiology  
Department of Biomedical, Surgical and Dental Sciences  
University of Milan  
Milan, Italy

4. Department of Molecular Biology and Microbiology  
Case Western Reserve University  
Cleveland, OH 44106, USA

5. Excision Biotherapeutics, Inc.  
3624 Market Street, #514  
Philadelphia, PA 19104

†Corresponding author

Phone: 215.707.5192; Fax: 215.707.4888

Email: [kamel.khalili@temple.edu](mailto:kamel.khalili@temple.edu) (senior corresponding author)

[wenhui.hu@temple.edu](mailto:wenhui.hu@temple.edu)

[rafalkim@temple.edu](mailto:rafalkim@temple.edu)

**Table S1**

| primer                                                   | sequence                                                            |
|----------------------------------------------------------|---------------------------------------------------------------------|
| <b>1. Cloning pX260-LTR-Cas9 constructs</b>              |                                                                     |
| <b>Kpn1-LTR(-454)-F</b>                                  | 5'- <b>GGTACCT</b> GGAAGGGCTAATTTGG-3'                              |
| <b>Kpn1-LTR(-120)-F</b>                                  | 5'- <b>GGTACCT</b> CGAGCTTTCTACAAGG-3'                              |
| <b>Xba1-LTR(-80)-F</b>                                   | 5'- <b>TCTAGAGGAGGTGTGGCCTGGGC-3'</b>                               |
| <b>LTR(+66)-Nco1-R</b>                                   | 5'- <b>CCATGGT</b> AAGCAGTGGGTTCC-3'                                |
| <b>2. Cloning lentiLTR(-80/+66)-Cas9-Blast construct</b> |                                                                     |
| <b>Nhe1-LTR(-80)-F</b>                                   | 5'- <b>GCTAGCGGAGGTGTGGCCTGGGC-3'</b>                               |
| <b>LTR(+66)-Xba1-R</b>                                   | 5'- <b>TCTAGATAAGCAGTGGGTTCC-3'</b>                                 |
| <b>3. PCRs</b>                                           |                                                                     |
| LTR -417/F                                               | 5'-GATCTGTGGATCTACCACACACA-3'                                       |
| LTR -19/R                                                | 5'-GCTGCTTATATGTAGCATCTGAG-3'                                       |
| LTR -374/F                                               | 5'-TTAGCAGAACTACACACCAGGGCC-3'                                      |
| LTR +43/R                                                | 5'-CCGAGAGCTCCCAGGCTCAGATCT-3'                                      |
| HIV-1 5'UTR +97/F                                        | 5'-AAGTAGTGTGTGCCCGTCTG-3'                                          |
| HIV-1 5'UTR +235/R                                       | 5'-TCGAGAGATCTCCTCTGGCT-3'                                          |
| HIV-1 Env +5828/F                                        | 5'- TCCTTGGGATGTTGATGATCT-3'                                        |
| HIV-1 Env +5977/R                                        | 5'- TGGCCCAAACATTATGTACC-3'                                         |
| b- actin/F                                               | 5'-CTACAATGAGCTGCGTGTGGC-3'                                         |
| b-actin/R                                                | 5'-CAGGTCCAGACGCAGGATGGC-3'                                         |
| <b>4. Taqman qPCRs</b>                                   |                                                                     |
| HIV-1 5'UTR F                                            | 5'-AAGTAGTGTGTGCCCGTCTG-3'                                          |
| HIV-1 5'UTR R                                            | 5'-TCGAGAGATCTCCTCTGGCT-3'                                          |
| HIV-1 5'UTR probe                                        | 5'-FAM-CTGTTCTGGGCGCCACTGCTA-ZEN-IowaBlackFQ-3'                     |
| HIV-1 env F                                              | 5'- TCCTTGGGATGTTGATGATCT-3'                                        |
| HIV-1 env R                                              | 5'- TGGCCCAAACATTATGTACC-3'                                         |
| HIV-1 env probe                                          | 5'-FAM-TGGTGGTGGTCTTCTTTCCACACA-ZEN-IowaBlackFQ-3'                  |
| Hs b-globin F                                            | 5'-CCCTTGGACCCAGAGGTTCT-3'                                          |
| Hs b-globin R                                            | 5'-CGAGCACTTTCTTGCCATGA-3'                                          |
| Hs b-globin probe:                                       | 5'-FAM-GCGAGCATCTGTCCACTCCTGATGCTGTTATGGGCGCTCGC-ZEN-IowaBlackFQ-3' |
| Hs b-actin F                                             | 5'-TGGACTTCGAGCAAGAGATG-3'                                          |
| Hs b-actin R                                             | 5'-GAAGGAAGGCTGGAAGAGTG-3'                                          |
| Hs b-actin probe:                                        | 5'-FAM-CGGCTGCTTCCAGCTCCTCC-ZEN-IowaBlackFQ-3'                      |

## SUPPLEMENTAL FIGURE LEGENDS

**Figure S1.** Position and nucleotide sequences of gRNA A/B targets within the LTR (highlighted in green, PAM in red) and LTR specific primers used in PCR on TZM-bl and in vitro infected Jurkat cells genomic DNA (highlighted in blue) in the reference HIV-1 NL4-3 genome. Sequences and sizes of LTR specific PCR products (full-length and truncated) and predicted edited fragment.

**Figure S2.** A representative agarose gel analyzing LTR specific PCR reactions used for quantification of Cas9/gRNA mediated LTR excision efficiency in experiments using the Jurkat 2D10 reporter cell line from Figures 3 and 4.

**Figure S3.** Position and nucleotide composition of LTR gRNA A/B targets (highlighted in green, PAM in red) and LTR specific primers used to analyze excision by PCR in Jurkat 2D10 cells (highlighted in blue) in the reference HIV-1 NL4-3 genome. Nucleotide sequences and sizes of amplicons (full-length and truncated LTR DNA) and predicted excised DNA fragment are shown.

**Figure S4. (a)** A representative fluorescence microscopy images of transduced/infected Jurkat cells at day 5 of infection. Expression of BFP is indicative of the presence a vector expressing gRNAs. HIV-1 infection was monitored by the level of GFP. **(b)** Quantitative comparison of cell numbers at various time points between the control and experimental samples treated with LTR-Cas9.

**Figure S5.** Primary human fetal astrocytes and microglia were transduced with lentiviral cocktails containing: lenti-LTR-80/+66-Cas9 (MOI 10), lenti-KLV-BFP-LTR A, B (MOI 3.3 of each). At day 3 post-transduction cells were infected with HIV-1<sub>NL4-3-GFP-P2A-Nef/VSV-G</sub> at MOI 1. One week after HIV-1 infection cells were harvested and viral expression levels were quantified by GFP

expression in flow cytometry **(a)** viral DNA levels **(b)** and viral RNA **(c)** by Taqman qPCR and qRT-PCRs using primer set and probe specific for Gag gene.

## Figure S1

### TZMbl

F [-413/-391] (T361)  
TGGAAGGGCTAATTTGGTCCCAAAAAAGACAAGAGATCCTT **GATCTGTGGATCTACCACACACA** AGGCTA  
**LTR A [-347/-328] PAM**  
CTTCCCTGATTGGCAGA ACTACACACCAGGGCCAGGG **ATCAGATATCCACTGACCTT** TGGATGGTGCTTC  
AAGTTAGTACCAGTTGAACCAGAGCAAGTAGAAGAGGCCAATGAAGGAGAGAACAACAGCTTGTACACC  
CTATGAGCCAGCATGGGATGGAGGACCCGGAGGGAGAAGTATTAGTGTGGAAGTTTGACAGCCTCCTAGC  
**PAM LTR B [-143/-124]**  
ATTTTCGTCACATGGCCCGAGAGCTGCAT **CCG GAGTACTACAAAGACTGCTG** ACATCGAGCTTTCTACAAG  
R [-41/-19] (T363)  
GGACTTCCGCTGGGGACTTTCCAGGGAGGTGTGGCCTGGGCGGGACTGGGGAGTGGCGAGCC **CTCAGAT**  
**Transcription start[+1]**  
**GCTACATATAAGCAGC** TGCTTTTTGCCTGTACTG **G**GTCTCTCTGGTTAGACCAGATCTGAGCCTGGGAGC  
TCTC **T**GGCTAACTAGGGAACCCACTGCTTAAGCCTCAATAAAGCTTGCCTTGAGTGCTCAAAGTAGTGTG

### PCR product full length LTR -413/-19: 395bp

**GATCTGTGGATCTACCACACACA** AGGCTACTTCCCTGATTGGCAGA ACTACACACCAGGGCCAGGG **ATCA**  
**GATATCCACTGACCTT** TGGATGGTGCTTCAAGTTAGTACCAGTTGAACCAGAGCAAGTAGAAGAGGCCAA  
TGAAGGAGAGAACAACAGCTTGTACACCCTATGAGCCAGCATGGGATGGAGGACCCGGAGGGAGAAGTA  
TTAGTGTGGAAGTTTGACAGCCTCCTAGCATTTTCGTCACATGGCCCGAGAGCTGCAT **CCGGAGTACTACA**  
**AAGACTGCTG** ACATCGAGCTTTCTACAAGGGACTTTCCGCTGGGGACTTTCCAGGGAGGTGTGGCCTGGG  
CGGGACTGGGGAGTGGCGAGCC **CTCAGATGCTACATATAAGCAGC**

### +SpCas9/gRNA LTR A+LTR B:

**GATCTGTGGATCTACCACACACA** AGGCTACTTCCCTGATTGGCAGA ACTACACACCAGGGCCAGGG **ATCA**  
**GATATCCACTGAC**

### Edited fragment: 190bp

↓ **CTT** **TGG** ATGGTGCTTCAAGTTAGTACCAGTTGAACCAGAGCAAGTAGAAGAGGCCAATGAAGGAGAGAA  
CAACAGCTTGTACACCCTATGAGCCAGCATGGGATGGAGGACCCGGAGGGAGAAGTATTAGTGTGGAAG  
TTTGACAGCCTCCTAGCATTTTCGTCACATGGCCCGAGAGCTGCAT **CCG** **GAG** ↓  
**TACTACAAAGACTGCTG** ACATCGAGCTTTCTACAAGGGACTTTCCGCTGGGGACTTTCCAGGGAGGTGTG  
GCCTGGGCGGGACTGGGGAGTGGCGAGCC **CTCAGATGCTACATATAAGCAGC**

### PCR product truncated LTR -413/-19: 205bp

**GATCTGTGGATCTACCACACACA** AGGCTACTTCCCTGATTGGCAGA ACTACACACCAGGGCCAGGG **ATCA**  
**GATATCCACTGAC** **T** **TACTACAAAGACTGCTG** ACATCGAGCTTTCTACAAGGGACTTTCCGCTGGGGACTTT  
CCAGGGAGGTGTGGCCTGGGCGGGACTGGGGAGTGGCGAGCC **CTCAGATGCTACATATAAGCAGC**

Figure S2

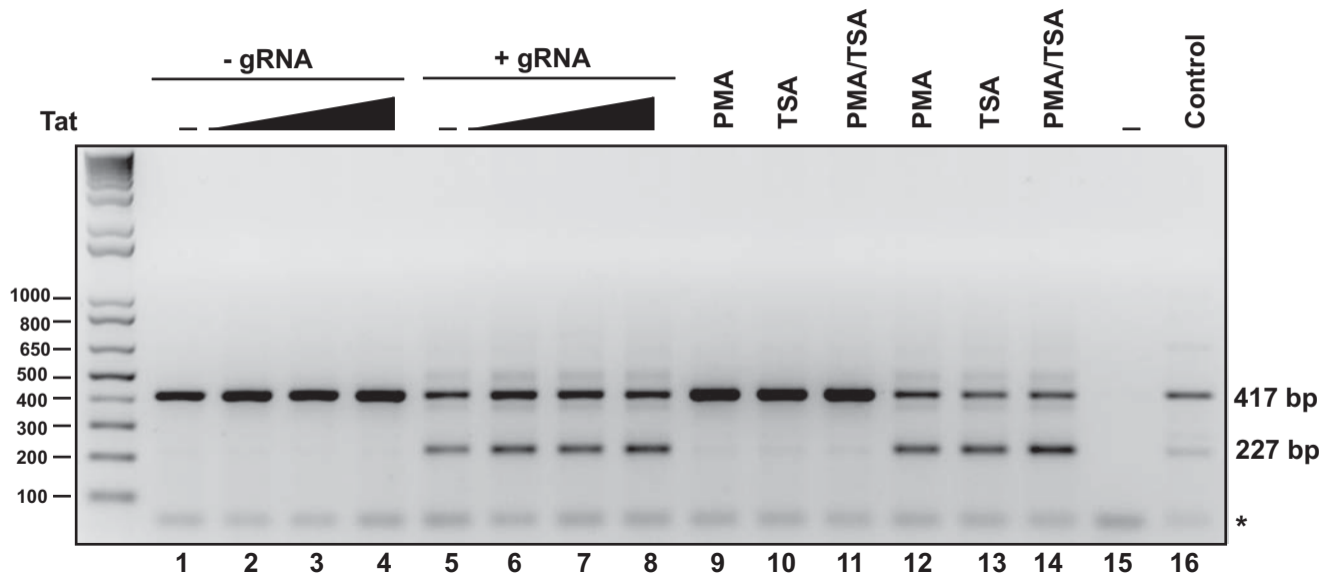

## Figure S3

### Jurkat 2D10

Sequence:

TGGAAGGGCTAATTTGGTCCCAAAAAAGACAAGAGATCCTTGATCTGTGGATCTACCACACACAAGGCTA  
F [-375/-352] LTR A [-347/-328] PAM  
CTTCCCTGATTGGCAGAACTACACACCAGGGCCAGGGATCAGATATCCACTGACCTTTGGATGGTGCTTC  
AAGTTAGTACCAGTTGAACCAGAGCAAGTAGAAGAGGCCAATGAAGGAGAGAACAACAGCTTGTACACC  
CTATGAGCCAGCATGGGATGGAGGACCCGGAGGGAGAAGTATTAGTGTGGAAGTTGACAGCCTCCTAGC  
PAM LTR B [-143/-124]  
ATTTTCGTCACATGGCCCGAGAGCTGCATCCGGAGTACTACAAAGACTGCTGACATCGAGCTTTCTACAAG  
GGACTTTCCGCTGGGGACTTTCCAGGGAGGTGTGGCCTGGGCGGGACTGGGGAGTGCCGAGCCCTCAGAT  
└─Transcription start[+1] R [+19/+43]  
GCTACATATAAGCAGCTGCTTTTTGCCTGTACTGGTCTCTCTGGTTAGACCAGATCTGAGCCTGGGAGC  
TCTCTGGCTAACTAGGGAACCCACTGCTTAAGCCTCAATAAAGCTTGCCTTGAGTGCTCAAAGTAGTGTG

### PCR product full length LTR -375/+43: 417bp

TTGGCAGAACTACACACCAGGGCCAGGGATCAGATATCCACTGACCTTTGGATGGTGCTTCAAGTTAGTA  
CCAGTTGAACCAGAGCAAGTAGAAGAGGCCAATGAAGGAGAGAACAACAGCTTGTACACCCTATGAGCC  
AGCATGGGATGGAGGACCCGGAGGGAGAAGTATTAGTGTGGAAGTTGACAGCCTCCTAGCATTTTCGTCA  
CATGGCCCGAGAGCTGCATCCGGAGTACTACAAAGACTGCTGACATCGAGCTTTCTACAAGGGACTTTCC  
GCTGGGGACTTTCCAGGGAGGTGTGGCCTGGGCGGGACTGGGGAGTGCCGAGCCCTCAGATGCTACATAT  
AAGCAGCTGCTTTTTGCCTGTACTGGTCTCTCTGGTTAGACCAGATCTGAGCCTGGGAGCTCTCTGG

### +SpCas9/gRNA LTR A+LTR B:

TTGGCAGAACTACACACCAGGGCCAGGGATCAGATATCCACTGAC

### Edited fragment: 190bp

↓ CTTGGATGGTGCTTCAAGTTAGTACCAGTTGAACCAGAGCAAGTAGAAGAGGCCAATGAAGGAGAGAA  
CAACAGCTTGTACACCCTATGAGCCAGCATGGGATGGAGGACCCGGAGGGAGAAGTATTAGTGTGGAAG  
TTTACAGCCTCCTAGCATTTTCGTACATGGCCCGAGAGCTGCATCCGGAG↓

### PCR product truncated LTR -375/-43: 227bp

TTGGCAGAACTACACACCAGGGCCAGGGATCAGATATCCACTGACTACTACAAAGACTGCTGACATCGAG  
CTTTCTACAAGGGACTTTCCGCTGGGGACTTTCCAGGGAGGTGTGGCCTGGGCGGGACTGGGGAGTGCCG  
AGCCCTCAGATGCTACATATAAGCAGCTGCTTTTTGCCTGTACTGGTCTCTCTGGTTAGACCAGATCTG  
AGCCTGGGAGCTCTCTGG

a

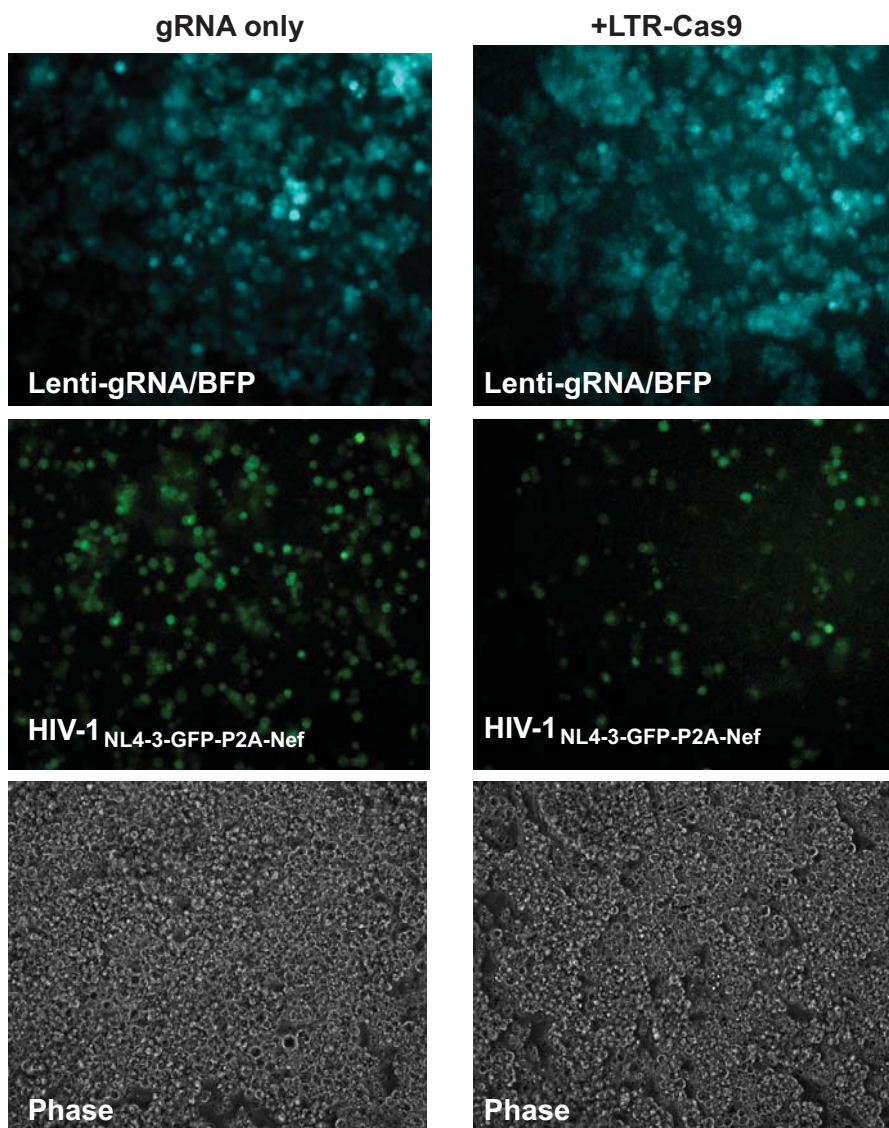

b

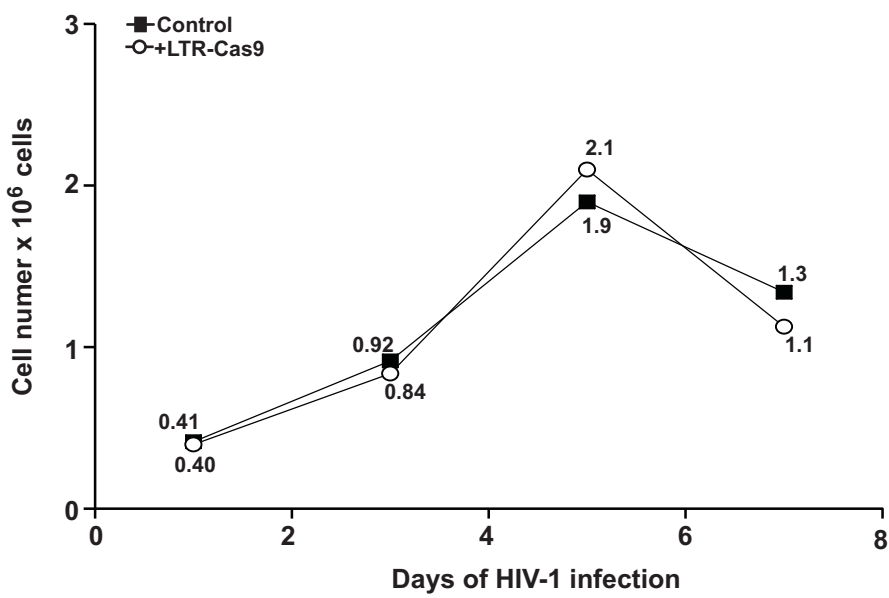



Figure S5

**a**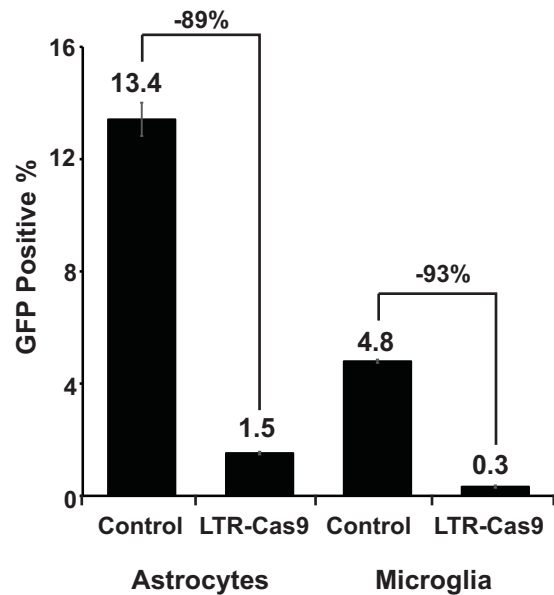**b**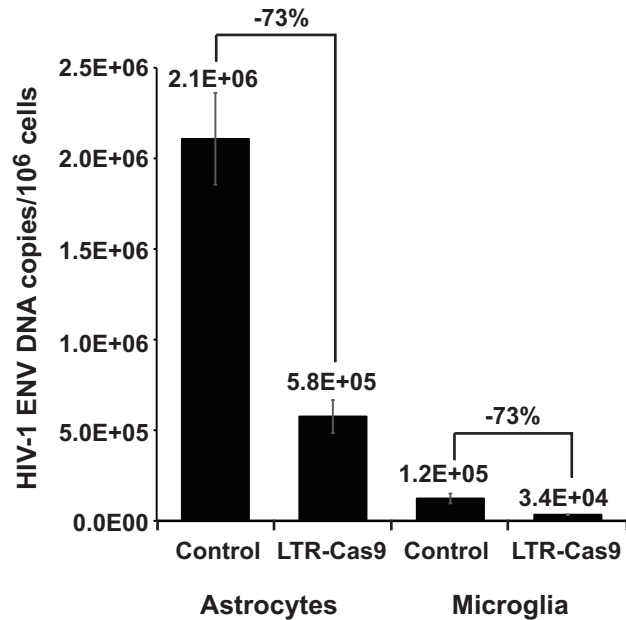**c**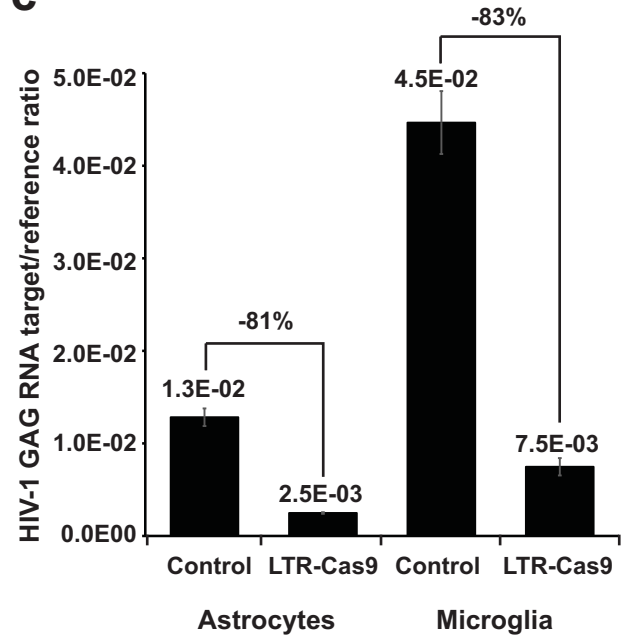

Supplement: srep31527-s1.pdf [file srep31527-s1.pdf]
